# Supplementary material for: B-Cell Epitope Mapping of TprC and TprD Variants of Treponema pallidum Subspecies Informs Vaccine Development for Human Treponematoses
Source: Front Immunol. 2022 Mar 29;13:862491. doi: 10.3389/fimmu.2022.862491 (PMC9001972; doi:10.3389/fimmu.2022.862491)
Supplement: Supplementary file 1 [file Table_1.xlsx]

## Sheet: TprC
Chain	Z	RMSD	lali	nres	% ID	Description					Number of strands
4frt-A	15.7	4.2	273	370	9	PROBABLE PORIN					18
4frt-B	15.6	4.2	270	374	9	PROBABLE PORIN					18
3t20-A	15.5	3.9	261	362	10	CIS-ACONITATE PORIN OPDH					18
2y0h-A	15.5	3.9	265	361	10	PROBABLE PORIN					18
3t0s-A	15.5	3.9	265	361	10	PORIN;					18
2y0k-A	15.5	3.9	262	364	7	PYROGLUTATMATE PORIN OPDO					18
3szv-A	15.4	3.7	257	364	8	PYROGLUTATMATE PORIN OPDO					18
2y0l-A	15.4	3.9	261	362	9	CIS-ACONITATE PORIN OPDH					18
3t24-B	15.4	4	268	368	9	PORIN;					18
4fso-B	15.2	3.9	249	338	8	PROBABLE PORIN					18
4fso-A	15.1	4	251	354	9	PROBABLE PORIN					18
4fms-B	15.1	4.2	265	368	7	PROBABLE PORIN					18
3szd-A	15.1	3.8	259	368	7	PORIN;					18
3szd-B	15	4.1	262	371	7	PORIN;					18
4fms-A	15	3.9	260	369	7	PROBABLE PORIN					18
3jty-B	14.9	4.2	272	383	8	BENF-LIKE PORIN					18
5ldt-C	14.9	3.5	274	403	12	MOMP PORIN					18
3sys-B	14.9	3.8	257	374	7	VANILLATE PORIN OPDK					18
4fsp-A	14.9	3.6	249	364	11	PROBABLE PORIN					18
2qtk-A	14.9	3.7	257	371	6	PROBABLE PORIN					18
1af6-C	14.9	4.6	281	421	9	MALTOPORIN;					18
2qtk-B	14.9	3.7	254	368	6	PROBABLE PORIN					18
1ujw-A	14.9	5.1	294	576	6	VITAMIN B12 RECEPTOR					22
5ldt-A	14.8	3.7	276	403	12	MOMP PORIN					18
3sy9-D	14.8	4.1	259	361	11	HISTIDINE PORIN OPCD					18
4kra-B	14.8	4.3	251	340	6	OUTER MEMBRANE PROTEIN F					16
4ft6-A	14.8	4	273	387	9	PROBABLE PORIN					18
2y2x-B	14.8	3.8	258	378	6	VANILLATE PORIN OPDK					18
3sys-A	14.8	3.6	254	374	7	VANILLATE PORIN OPDK					18
5ldt-B	14.8	3.7	274	403	12	MOMP PORIN					18
3jty-C	14.8	4	267	384	7	BENF-LIKE PORIN					18
5dl8-A	14.8	4.5	277	391	11	BENZOATE TRANSPORT PORIN BENP					18
3jty-D	14.8	3.9	267	384	7	BENF-LIKE PORIN					18
2y2x-A	14.8	3.7	255	374	7	VANILLATE PORIN OPDK					18
3t24-A	14.8	4	268	377	9	PORIN;					18
2xe5-D	14.7	4.2	245	343	9	OUTER MEMBRANE PROTEIN C					16
2xe5-C	14.7	4.2	245	343	9	OUTER MEMBRANE PROTEIN C					16
2xe2-C	14.7	4.2	245	343	9	OUTER MEMBRANE PROTEIN C					16
2xe5-E	14.7	4.2	245	343	9	OUTER MEMBRANE PROTEIN C					16
3jty-A	14.7	4.3	273	388	7	BENF-LIKE PORIN					18
2xe5-A	14.7	4.2	245	343	9	OUTER MEMBRANE PROTEIN C					16
5dl8-B	14.7	4.4	276	391	12	BENZOATE TRANSPORT PORIN BENP					18
3k19-I	14.6	4.1	242	340	13	OUTER MEMBRANE PROTEIN F					16
3nsg-C	14.6	4.3	248	341	6	OUTER MEMBRANE PROTEIN F					16
3o0e-C	14.6	4.1	243	340	13	PORIN OMPF					16
7nst-C	14.6	4.9	248	340	13	OUTER MEMBRANE PROTEIN F					16
5o77-A	14.6	4.1	239	337	8	OMPK35;					16
2xe5-F	14.6	4.2	245	343	9	OUTER MEMBRANE PROTEIN C					16
3k19-L	14.6	4.1	242	340	13	OUTER MEMBRANE PROTEIN F					16
3k19-H	14.6	4.1	242	340	13	OUTER MEMBRANE PROTEIN F					16

## Sheet: TprD2
Chain	Z	RMSD	lali	nres	% ID	Description							Number of strands
1ujw-A	14.9	4.8	298	576	8	VITAMIN B12 RECEPTOR							22
5onu-A	14.6	4	248	320	6	OUTER MEMBRANE PROTEIN OMPU							16
6ehb-C	14.6	4.3	240	320	6	OUTER MEMBRANE PROTEIN U							16
5onu-C	14.6	4	247	320	6	OUTER MEMBRANE PROTEIN OMPU							16
6ehe-A	14.6	5.3	245	302	11	OMPT PROTEIN							16
6ehb-B	14.5	4	236	317	7	OUTER MEMBRANE PROTEIN U							16
5onu-B	14.5	4	243	320	7	OUTER MEMBRANE PROTEIN OMPU							16
4frt-A	14.5	3.8	257	370	7	PROBABLE PORIN							18
6ehf-A	14.5	5.2	239	318	10	OMPT PROTEIN							16
6ehd-A	14.4	5	240	322	10	OMPT PROTEIN							16
5o78-C	14.4	4.4	249	331	8	PHOSPHOPORIN PHOE							16
5o78-B	14.4	4.4	244	331	8	PHOSPHOPORIN PHOE							16
3t24-B	14.4	4.1	263	368	9	PORIN;							18
6ehb-A	14.4	3.8	233	318	6	OUTER MEMBRANE PROTEIN U							16
2y0l-A	14.4	3.8	256	362	9	CIS-ACONITATE PORIN OPHD							18
5o78-A	14.4	4.4	246	331	8	PHOSPHOPORIN PHOE							16
3t20-A	14.4	3.8	256	362	9	CIS-ACONITATE PORIN OPHD							18
6v78-C	14.3	4.1	246	353	10	OMPK37;							16
1gfn-A	14.3	4.4	245	327	12	MATRIX PORIN OUTER MEMBRANE PROTEIN F							16
6ehc-A	14.3	3.9	240	307	7	OUTER MEMBRANE PROTEIN U							16
5o9c-B	14.3	4.6	247	348	11	OSMOPORIN OMP36							16
6ehc-B	14.3	4.1	243	307	6	OUTER MEMBRANE PROTEIN U							16
4fms-B	14.3	4	262	368	7	PROBABLE PORIN							18
4frt-B	14.2	3.8	255	374	7	PROBABLE PORIN							18
3szd-A	14.2	3.8	260	368	7	PORIN;							18
3wi5-A	14.2	4	238	312	11	MAJOR OUTER MEMBRANE PROTEIN P.IB							16
5mdq-B	14.2	4.4	242	350	8	CHITOPORIN;							16
1af6-B	14.2	4.2	274	421	10	MALTOPORIN;							18
1e54-A	14.1	3.6	233	332	8	OUTER MEMBRANE PORIN PROTEIN 32							16
5ldt-A	14.1	3.8	279	403	12	MOMP PORIN							18
6ene-A	14.1	4.4	245	329	11	PHOSPHOPORIN PHOE							16
4bum-X	14.1	3.5	241	283	7	VOLTAGE-DEPENDENT ANION CHANNEL 2							19
5o77-A	14.1	4.4	245	337	8	OMPK35;							16
6rcp-D	14.1	4.5	247	349	9	OMPK36;							16
6rcp-F	14.1	4.5	248	349	9	OMPK36;							16
2fgr-A	14.1	3.7	233	332	8	OUTER MEMBRANE PORIN PROTEIN 32							16
3szd-B	14.1	3.9	259	371	7	PORIN;							18
6rcp-J	14.1	4.7	250	349	8	OMPK36;							16
4fms-A	14.1	3.8	259	369	7	PROBABLE PORIN							18
6ene-C	14.1	4.3	249	329	10	PHOSPHOPORIN PHOE							16
3szv-A	14.1	4	253	364	8	PYROGLUTATMATE PORIN OPDO							18
7nie-C	14	3.6	235	294	9	GLYCEROL KINASE							19
7nie-D	14	3.6	235	294	9	GLYCEROL KINASE							19
4kra-C	14	4.6	252	337	7	OUTER MEMBRANE PROTEIN F							16
7nie-L	14	3.6	235	294	9	GLYCEROL KINASE							19
4lsh-B	14	4.4	249	334	13	OUTER MEMBRANE PROTEIN F							16
4kra-B	14	4.3	252	340	7	OUTER MEMBRANE PROTEIN F							16
2qtk-B	14	4	257	368	6	PROBABLE PORIN							18
6rcp-L	14	4.8	249	349	8	OMPK36;							16
3sy9-C	14	4	251	360	11	HISTIDINE PORIN OPDC							18
